# Supplementary material for: Multimodal analysis of cfDNA methylomes for early detecting esophageal squamous cell carcinoma and precancerous lesions
Source: PubMed Central journal article supplement (PMC11065998; doi:10.1038/s41467-024-47886-1), 2024-05-02
Supplement: 41467_2024_47886_MOESM3_ESM.pdf [file 41467_2024_47886_MOESM3_ESM.pdf]

## **Description of Additional Supplementary Files**

File Name: Supplementary Data 1

Description: Genes in differentially methylated regions of the ESCC-cfMeth model.

File Name: Supplementary Data 2

Description: Genes in regions of copy number variants in ESCC cfDNA.
